# Supplementary material for: The Establishment of Ultrasonic-Assisted Extraction for the Recovery of Phenolic Compounds and Evaluation of Their Antioxidant Activity from Morus alba Leaves
Source: MDPI journal article supplement (doi:10.3390/foods11030314), 2022-01-24
Supplement: s1 [file s1]

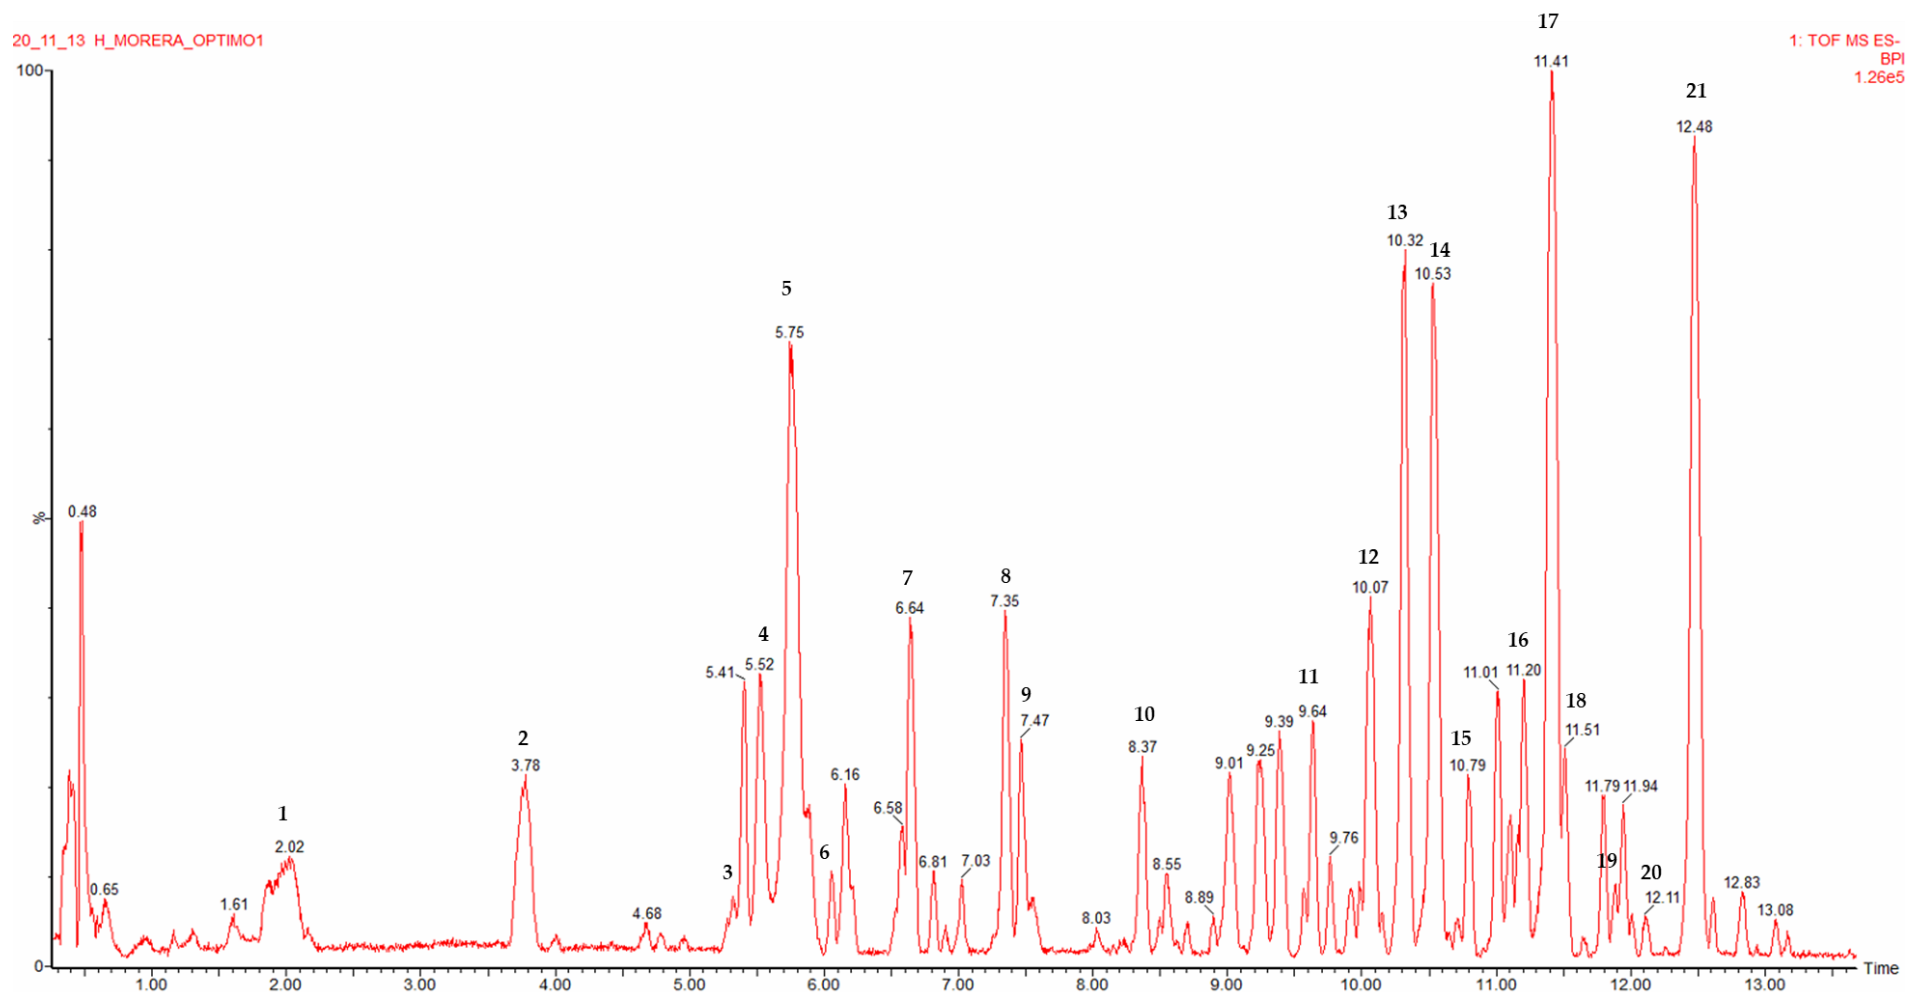

**Figure S1.** Base peak chromatogram (BPC) obtained from HPLC-ESI-TOF-MS analysis of *Morus alba* leaf extract obtained by optimal ultrasonic assisted extraction conditions. Peaks have been numbered according to the elution order.
